# Supplementary material
Source: PubMed Central journal article supplement (PMC8499019)
Supplement: NIHMS1744502-supplement-Supplementary_Material.pdf [file NIHMS1744502-supplement-Supplementary_Material.pdf]

## Supporting Information

### Multiplexed Ion Beam Imaging Readout of Single-Cell Immunoblotting

Gabriela Lomeli<sup>1,2</sup>, Marc Bosse<sup>3</sup>, Sean C. Bendall<sup>3</sup>, Michael Angelo<sup>3\*</sup> and Amy E. Herr<sup>1,2,4\*</sup>

<sup>1</sup>The UC Berkeley-UCSF Graduate Program in Bioengineering, University of California, Berkeley, California 94720, United States

<sup>2</sup>Department of Bioengineering, University of California, Berkeley, California 94720, United States

<sup>3</sup>Department of Pathology, Stanford University, Stanford, California 94025, United States

<sup>4</sup>Chan Zuckerberg Biohub, San Francisco, California 94158, United States

\*corresponding authors: aeh@berkeley.edu, mangelo0@stanford.edu

### Table of Contents

|                                                                                         |            |
|-----------------------------------------------------------------------------------------|------------|
| <b>Supplemental Figure S1. Background signal for metal-tagged antibodies.....</b>       | <b>S-2</b> |
| <b>Supplemental Figure S2. PA gel on glass slide is dehydrated before MIBI-TOF.....</b> | <b>S-3</b> |
| <b>Supplemental Note S1. Calculation of normalized SNR.....</b>                         | <b>S-4</b> |
| <b>Supplemental Table S1. Composition of IEF lid gel.....</b>                           | <b>S-5</b> |
| <b>Supplemental Table S2. Imaging conditions and depth rasterized data.....</b>         | <b>S-6</b> |
| <b>Reference.....</b>                                                                   | <b>S-7</b> |

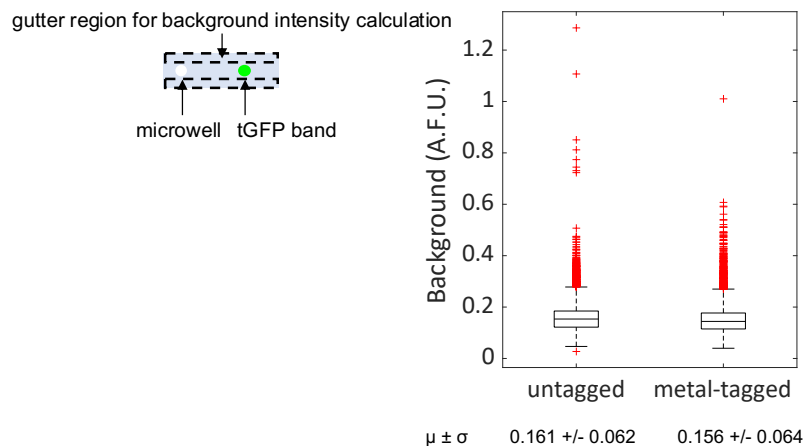

**Supplemental Figure S1. Background signal for metal-tagged antibodies.** Boxplot of background signal from the same results depicted in main text Figure 2D. Background intensity was calculated from a gutter region of each analyzed ROI chosen as 3-4 standard deviations away from the peak center as depicted in the schematic. Horizontal line in the boxplot is the median (higher for gels immunoprobed with untagged 1° Ab, Mann-Whitney U-test p-value <0.0005) and box edges are at 25th and 75th percentile. Mean and standard deviation of data is displayed below plot. Difference in background signal in scWB for metal-tagged antibody versus untagged antibody configuration is statistically significant, but small.  $n_{\text{Untagged}} = 849$  cells,  $n_{\text{Metal-tagged}} = 728$  cells.

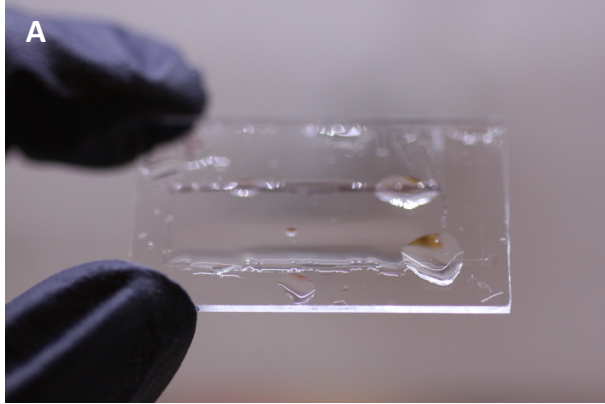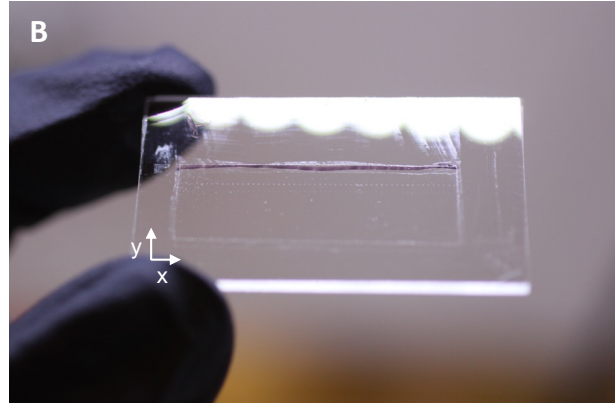

**Supplemental Figure S2. PA gel on glass slide is dehydrated before MIBI-TOF.** (A) Hydrated scIEF chip on half of a standard microscope slide. (B) Dehydrated scIEF chip. Single row of microwells is visible.

### Note S1. Calculation of normalized SNR

We calculated a normalized SNR in Figure 3C of increasingly summed confocal slices to investigate the relationship between percent of gel depth imaged and SNR, since percent of gel depth imaged is a tunable parameter in MIBI-TOF. With an in-house Matlab script, we performed the following:

1. From each confocal z-stack of a single scIB lane with  $n$  slices, we summed slices 1, 1-2, 1-3, 1-4...1- $n$  with slice 1 being the top layer of the gel and slice  $n$  being the bottom layer of the gel (gel-microscope slide interface). The result was  $n$  images with the first image being just the top layer of the gel and the  $n$ th image being the sum of the entirety of the gel over its depth.
2. For each of the  $n$  images, we performed background subtraction, Gaussian fitting, and calculated SNR as previously described<sup>1</sup>. Images with protein bands with  $\text{SNR} < 3$  were disregarded.
3. Since cell-to-cell variation resulted in large differences in absolute SNR values, we normalized each SNR value by the maximum SNR within the  $n$  images for each cell, which allowed improved side-by-side comparison of the biological replicates.

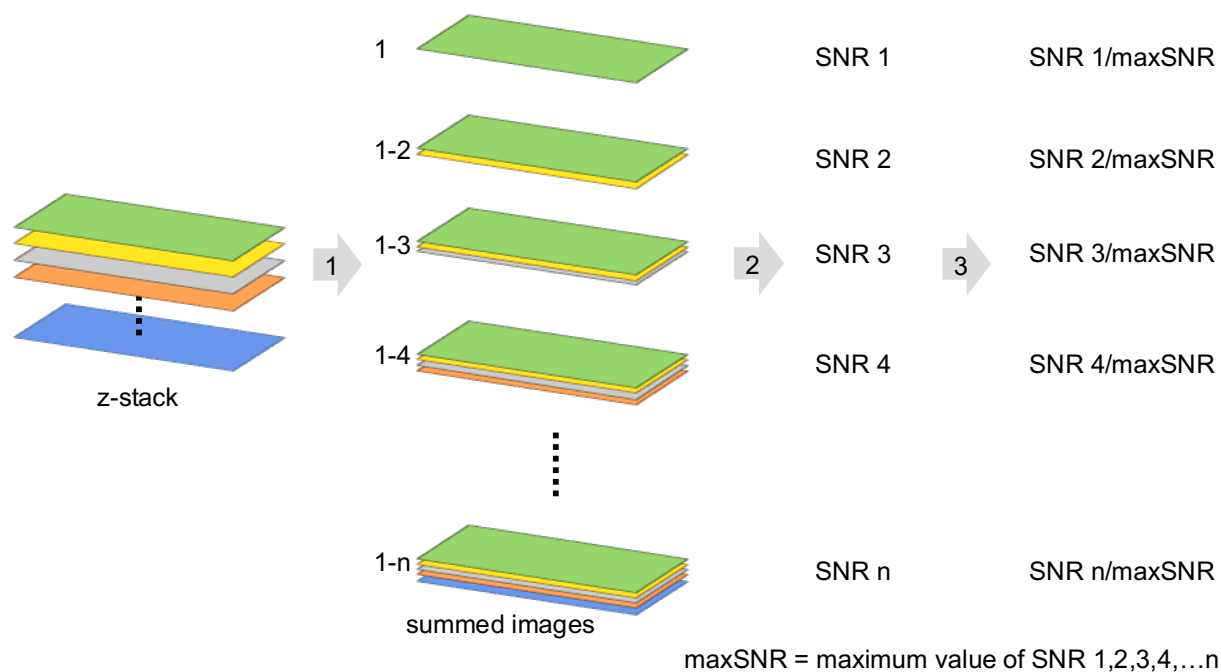

**Supplemental Table S1. Composition of IEF lid gel.** Components of the 3-part lid gel used for lysis and electrophoresis in the scIEF assay.

| Lid gel components          | pH 4 anolyte boundary condition                                                                                     | Focusing region                                                                                                                                                                                                                         | pH 10 catholyte boundary condition                                                                                  |
|-----------------------------|---------------------------------------------------------------------------------------------------------------------|-----------------------------------------------------------------------------------------------------------------------------------------------------------------------------------------------------------------------------------------|---------------------------------------------------------------------------------------------------------------------|
| Polyacrylamide gel          | <ul style="list-style-type: none"> <li>• 15 %T</li> <li>• 3.3 %C</li> <li>• 0.2% VA-086</li> </ul>                  | <ul style="list-style-type: none"> <li>• 15 %T</li> <li>• 3.3 %C</li> <li>• 0.2% VA-086</li> </ul>                                                                                                                                      | <ul style="list-style-type: none"> <li>• 15 %T</li> <li>• 3.3 %C</li> <li>• 0.2% VA-086</li> </ul>                  |
| IEF reagents and detergents |                                                                                                                     | <ul style="list-style-type: none"> <li>• 1% final ZOOM™ Carrier Ampholytes pH 4-7</li> <li>• 1% (v/v) TritonX-100</li> <li>• 3.6% (w/v) CHAPS</li> <li>• 0.0125% (w/v) digitonin</li> <li>• 7 M urea</li> <li>• 2 M thiourea</li> </ul> |                                                                                                                     |
| Boundary conditions         | <ul style="list-style-type: none"> <li>• 13.6 mM pKa 3.6 immobiline</li> <li>• 6.4 mM pKa 9.3 immobiline</li> </ul> |                                                                                                                                                                                                                                         | <ul style="list-style-type: none"> <li>• 5.6 mM pKa 3.6 immobiline</li> <li>• 14.4 mM pKa 9.3 immobiline</li> </ul> |

**Supplemental Table S2. Imaging conditions and depth rasterized data.**

| <b>Fig</b>   | <b>Current (nA)</b> | <b>FOV size (<math>\mu\text{m}</math>)</b> | <b>dwell time (ms)</b> | <b># planes</b> | <b>pixels</b> | <b>Ion dose/plane (nA<math>\times</math>hr/mm<sup>2</sup>)</b> | <b>Ion dose total (nA<math>\times</math>hr/mm<sup>2</sup>)</b> | <b>Average depth rasterized (<math>\mu\text{m}</math>)</b> |
|--------------|---------------------|--------------------------------------------|------------------------|-----------------|---------------|----------------------------------------------------------------|----------------------------------------------------------------|------------------------------------------------------------|
| <b>4B, 5</b> | 21.9                | 200                                        | 4                      | 1               | 256           | 39.87                                                          | 39.87                                                          | 1.48                                                       |
| <b>4B</b>    | 21.9                | 200                                        | 4                      | 2               | 256           | 39.87                                                          | 79.74                                                          | 1.73                                                       |
| <b>4B</b>    | 9.5                 | 400                                        | 1                      | 10              | 256           | 1.08                                                           | 10.81                                                          | 0.13                                                       |
| <b>4B</b>    | 47                  | 400                                        | 4                      | 1               | 256           | 21.39                                                          | 21.39                                                          | 0.44                                                       |

## Reference

1. Kang, C.-C. *et al.* Single cell-resolution western blotting. *Nat. Protoc.* **11**, (2016).
